# Supplementary material for: DFT and TD-DFT Study of the Chemical Effect in the SERS Spectra of Piperidine Adsorbed on Silver Colloidal Nanoparticles
Source: Nanomaterials (Basel). 2022 Aug 24;12(17):2907. doi: 10.3390/nano12172907 (PMC9458020; doi:10.3390/nano12172907)

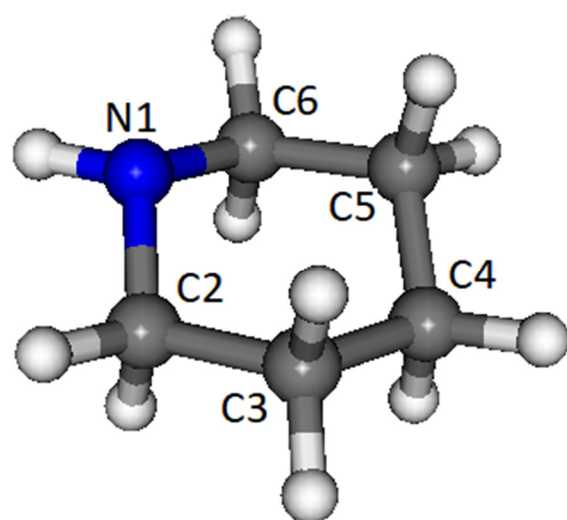

| Distance (Å) | exp.   | calc. |
|--------------|--------|-------|
| N1-C2        | 1.4613 | 1.469 |
| N1-C6        | 1.4602 | 1.469 |
| C2-C3        | 1.5207 | 1.531 |
| C5-C6        | 1.5181 | 1.531 |
| C3-C4        | 1.5189 | 1.536 |
| C4-C5        | 1.5230 | 1.536 |

| Angle (degree) | exp.   | calc. |
|----------------|--------|-------|
| C2-N1-C6       | 111.04 | 111.8 |
| N1-C2-C3       | 109.84 | 109.9 |
| N1-C6-C5       | 109.96 | 109.9 |
| C2-C3-C4       | 110.70 | 110.7 |
| C4-C5-C6       | 110.21 | 110.7 |
| C3-C4-C5       | 110.34 | 110.7 |

**Figure S1.** DFT-optimized structure of piperidine. Experimental structural parameters. Reprinted from Ref. [29].

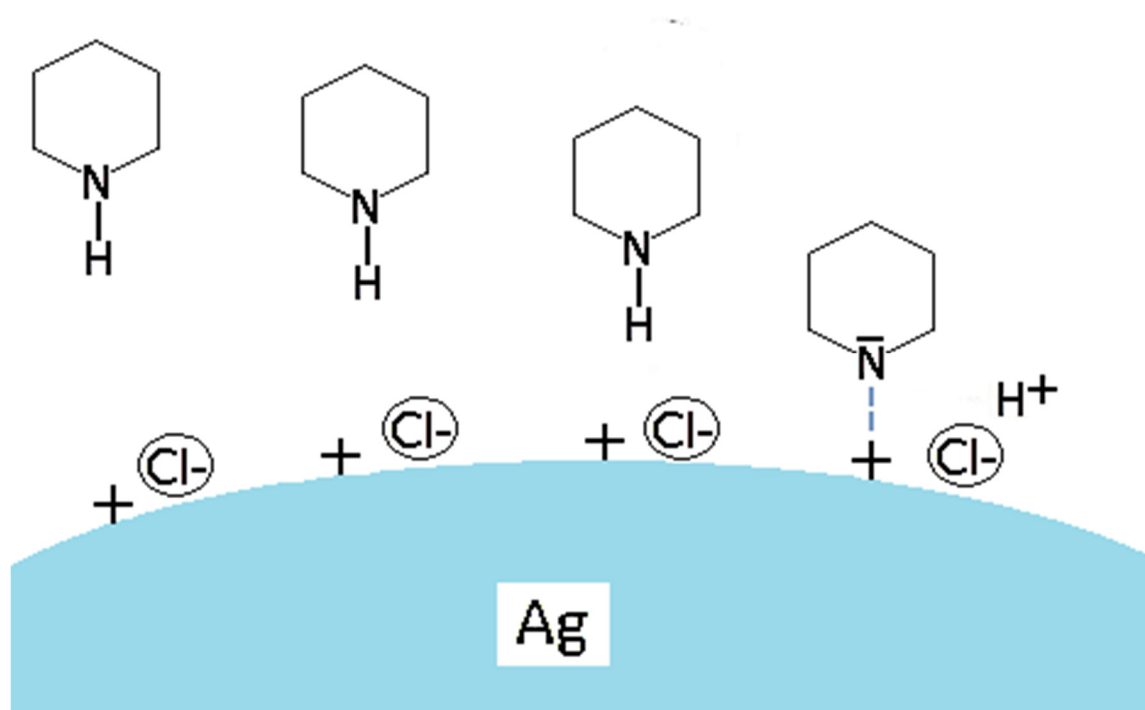

**Figure S2.** Possible reaction of piperidine with the positive active sites of the Ag surface.

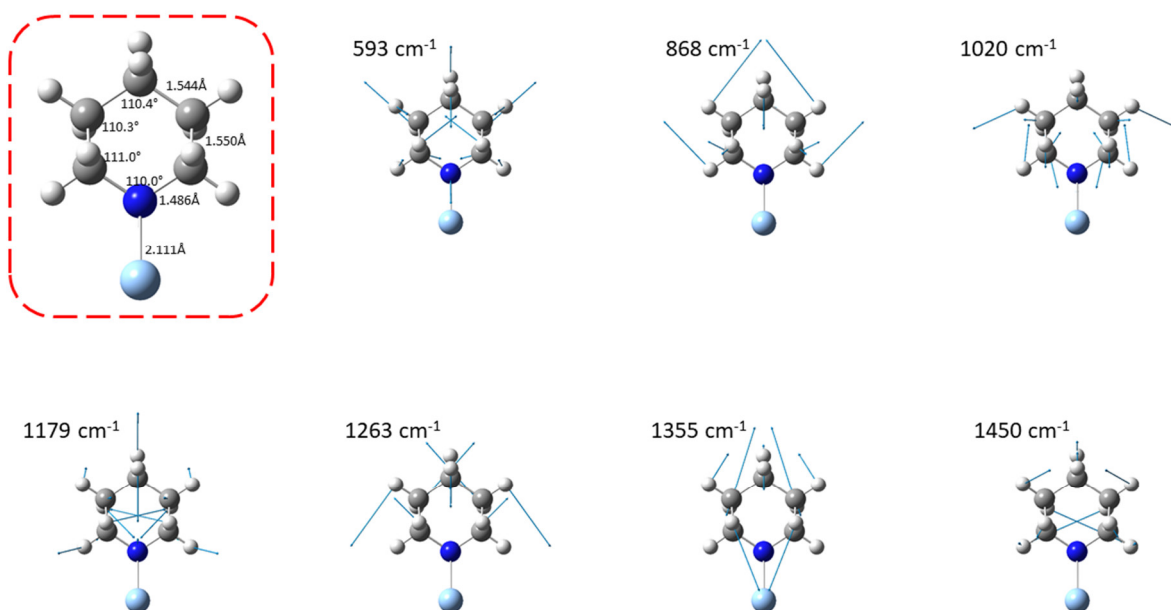

**Figure S3.** Calculated structure and normal modes of the Anion-Ag<sup>+</sup> equatorial complex corresponding to the most prominent experimental SERS bands (see **Figure 2**).

**Table S1.** Binding energies of the model shown in **Figure 3** of the main manuscript.

| Binding energy    | type of model                    |
|-------------------|----------------------------------|
| -202.25 kcal/mole | Anion-Ag <sup>+</sup> equatorial |
| -204.42 kcal/mole | Anion-Ag <sup>+</sup> axial      |
| -63.45 kcal/mole  | Pipe-Ag <sup>+</sup> equatorial  |
| -65.19 kcal/mole  | Pipe-Ag <sup>+</sup> axial       |
| -11.93 kcal/mole  | Pipe-Ag equatorial               |
| -11.09 kcal/mole  | Pipe-Ag axial                    |

**Table S2.** Comparison of calculated Raman frequencies of the Anion-Ag+ equatorial model with different levels of theory and experimental SERS data.

| SERS<br>Ag<br>colloid | Calculated<br>B3LYP/LANL2DZ | Calculated B3LYP/6-<br>311++G**+LANL2DZ(Ag) | Calculated CAM-<br>B3LYP/LANL2DZ |
|-----------------------|-----------------------------|---------------------------------------------|----------------------------------|
| 438                   | 452                         | 414                                         | 406                              |
| 461                   | 478                         | 480                                         | 485                              |
| 593                   | 611                         | 617                                         | 622                              |
| 810                   | 821                         | 819                                         | ?                                |
| 846                   | 868                         | 860                                         | 843                              |
| 868                   | 884                         | 891                                         | 878                              |
| 983                   | 981                         | 973                                         | 990                              |
| 1020                  | 1032                        | 1017                                        | 1051                             |
| 1056                  | 1041                        | 1034                                        | 1068                             |
| 1154                  | 1157                        | 1153                                        | 1171                             |
| 1179                  | 1166                        | ?                                           | 1182                             |
| 1263                  | 1275                        | 1292                                        | 1286                             |
| 1289                  | 1290                        | ?                                           | 1304                             |
| 1355                  | 1367                        | 1359                                        | 1312                             |
| 1373                  | 1389                        | 1377                                        | 1376                             |
|                       |                             |                                             | 1388 ?                           |
| 1450                  | 1494                        | 1465                                        | ?                                |
| 1470                  | 1498                        | 1477                                        | 1500                             |

**Table S3.** Comparison of experimental and calculated frequencies for piperidine Anion linked to Ag<sup>+</sup> and Ag<sub>5</sub><sup>+</sup>. The four silver atoms on the plane were kept fixed during the structural relaxation.

**Table**

| SERS<br>Ag<br>colloid | Calculated<br>Anion-Ag <sup>+</sup><br>equatorial | Calculated<br>Anion-Ag <sub>5</sub> <sup>+</sup><br>equatorial |
|-----------------------|---------------------------------------------------|----------------------------------------------------------------|
| 438                   | 452                                               | 440                                                            |
| 461                   | 478                                               | 469                                                            |
| 593                   | 611                                               | 617                                                            |
| 810                   | 821                                               | 815                                                            |
| 846                   | 868                                               | 869                                                            |
| 868                   | 884                                               | 881                                                            |
| 983                   | 981                                               | 980                                                            |
| 1020                  | 1032                                              | 1035                                                           |
| 1056                  | 1041                                              | 1048                                                           |
| 1154                  | 1157                                              | 1129                                                           |
| 1179                  | 1166                                              | 1146                                                           |
| 1263                  | 1275                                              | 1267                                                           |
| 1289                  | 1290                                              | 1290                                                           |
| 1355                  | 1367                                              | 1357                                                           |
| 1373                  | 1389                                              | 1394                                                           |
| 1450                  | 1488                                              | 1484                                                           |
| 1470                  | 1498                                              | 1490                                                           |

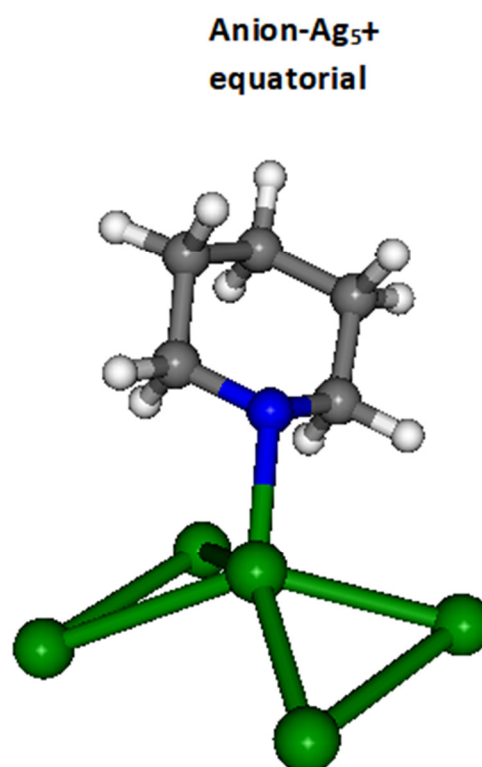

Supplement: Supplementary file 1 [file nanomaterials-12-02907-s001.zip › nanomaterials-1863481-supplementary.pdf]
